# Supplementary material
Source: Royal Society of Chemistry journal article supplement (doi:10.1039/d6tc00228e)
Supplement: d6tc00228e1.pdf [file d6tc00228e1.pdf]

## Supplemental Material

### In-situ observation of ferroelectric-antiferroelectric structural evolution in Sr-modulated sodium niobate with unraveling the polarization origin

Changming Zhu\*, Si Lu, Xinlin Jiang, Liguang Wang\*\*, Qingyi Wang, Guibo Yu, Houbing Zhou  
*College of Physics and Technology, Guangxi Normal University & University Engineering Research Center of Advanced Functional Materials and intelligent sensing, Guangxi, Guilin 541004, China*

\* Corresponding author. E-mail address: zhuchangming@gxnu.edu.cn (Changming Zhu\*)

wangliguang@gxnu.edu.cn (Liguang Wang\*\*)

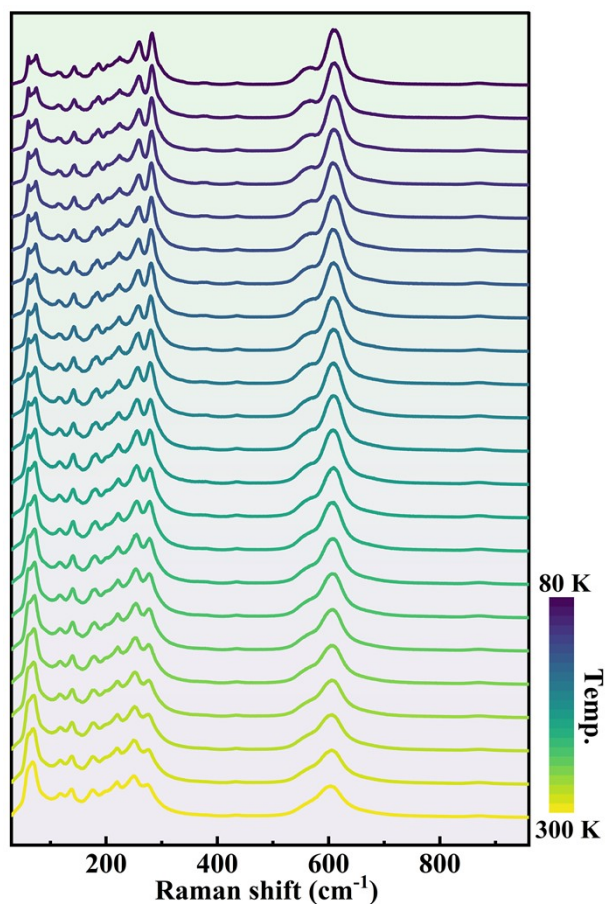

**Fig. S1** The in-situ Raman spectra of the NSN-4 sample as a function of temperature. Here, the “Temp.” refers to the measurement temperature.
